# Supplementary material
Source: PubMed Central journal article supplement (PMC3136385)

**Supplementary Figures 1-4.** Genome-wide LODS (red line) and HLODS (black line) under four models of inheritance.

# Dominant, 0.001, 0.5

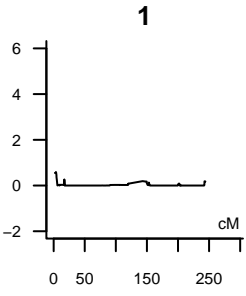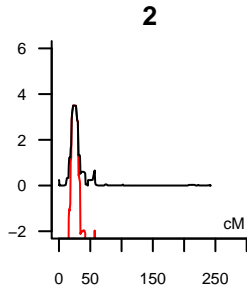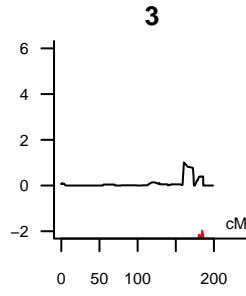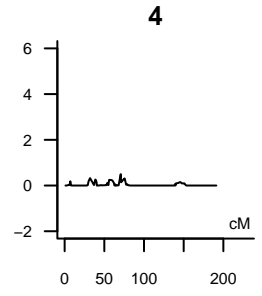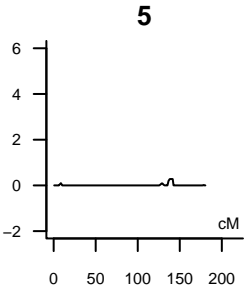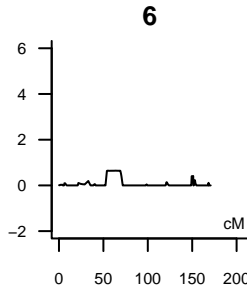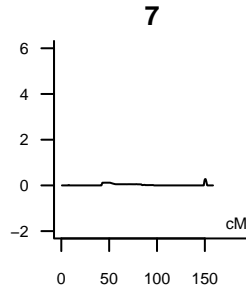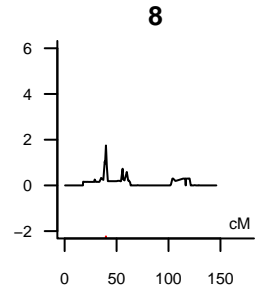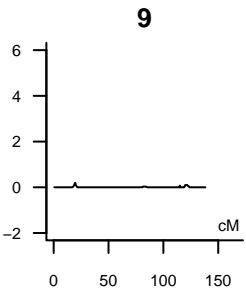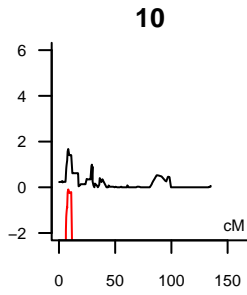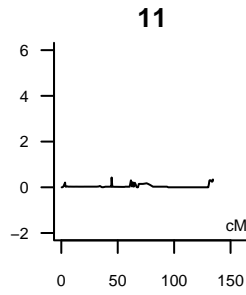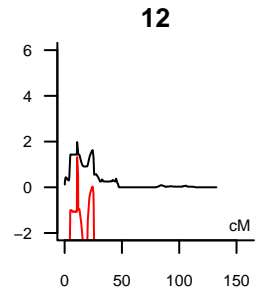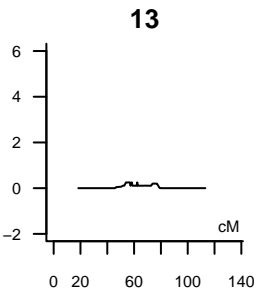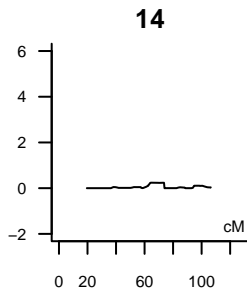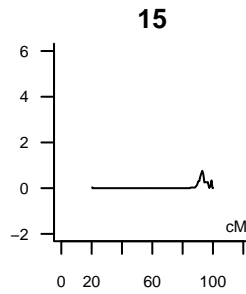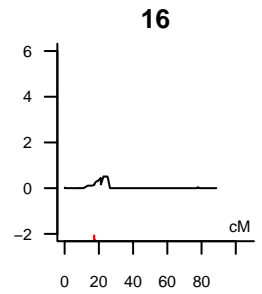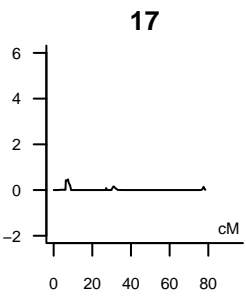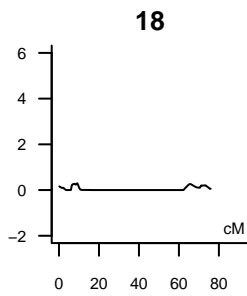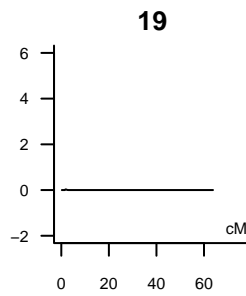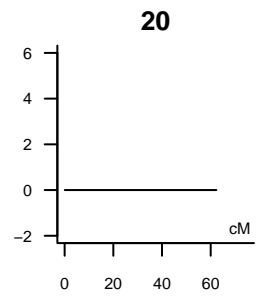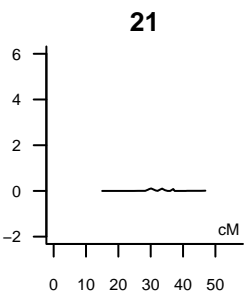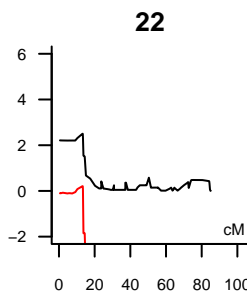

# Dominant, 0.1, 0.5

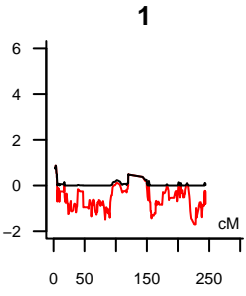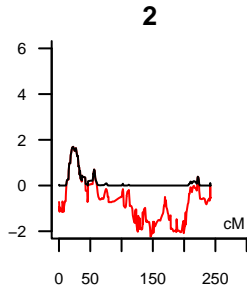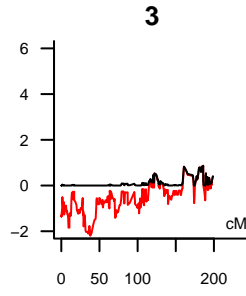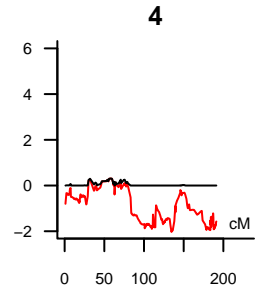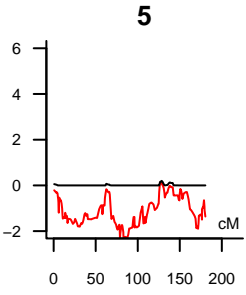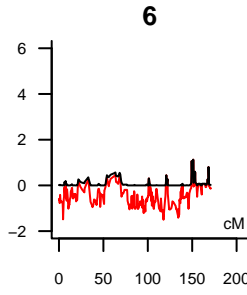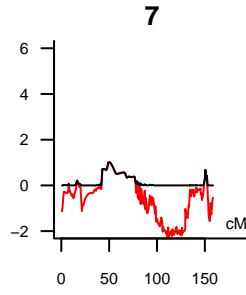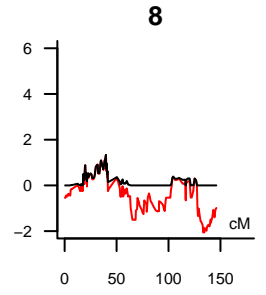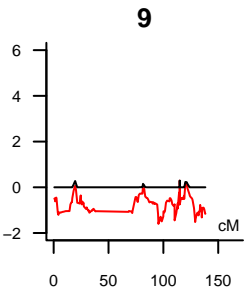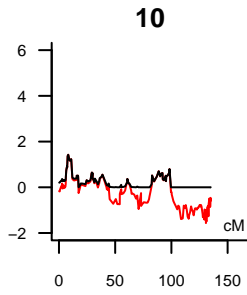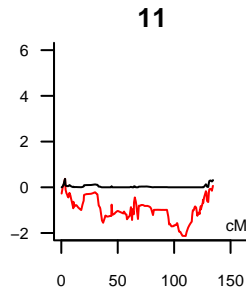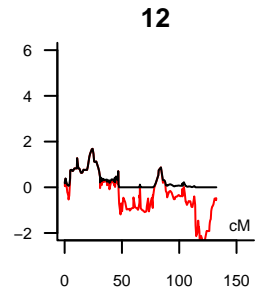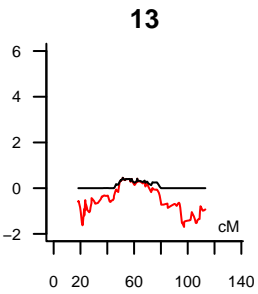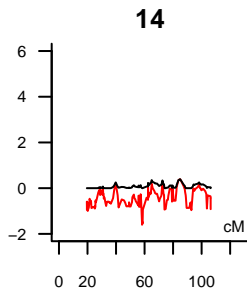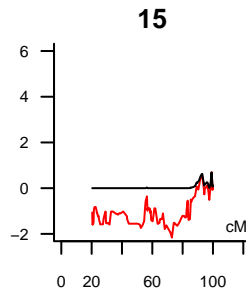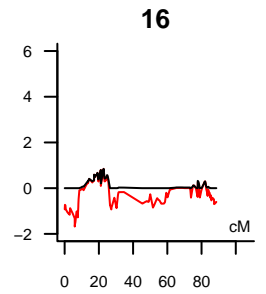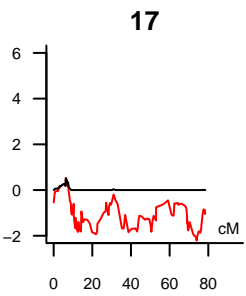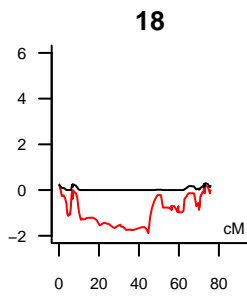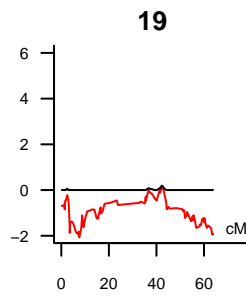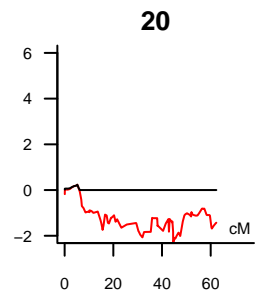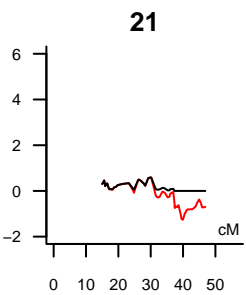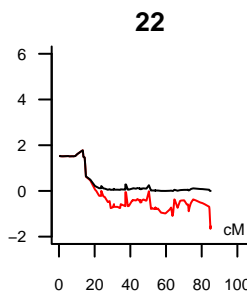

# Recessive, 0.001, 0.5

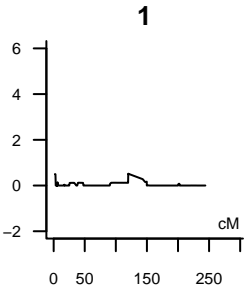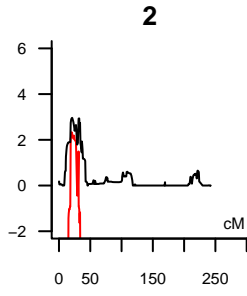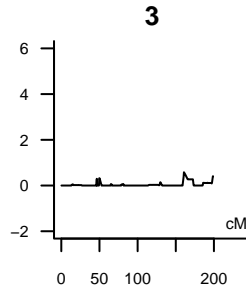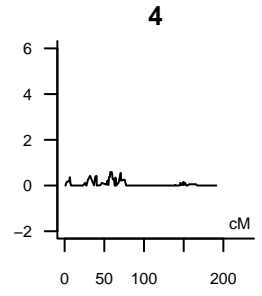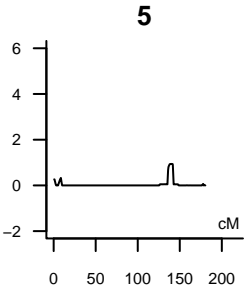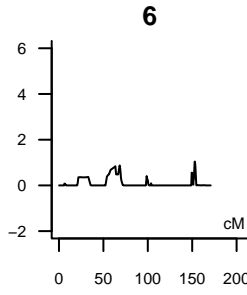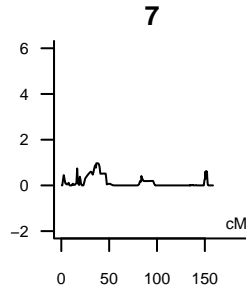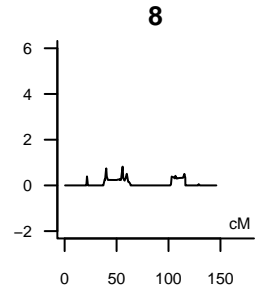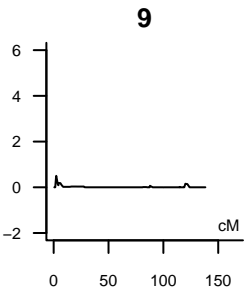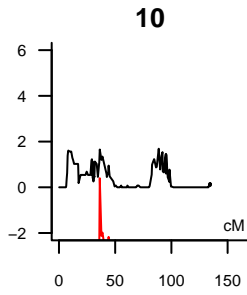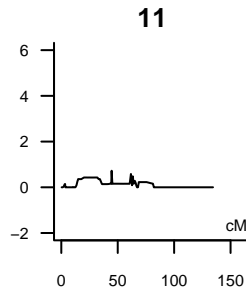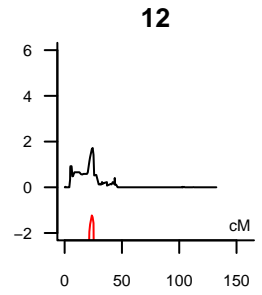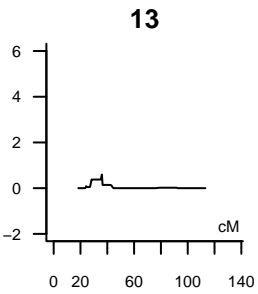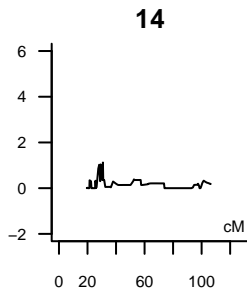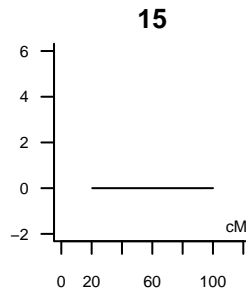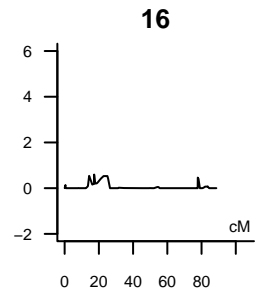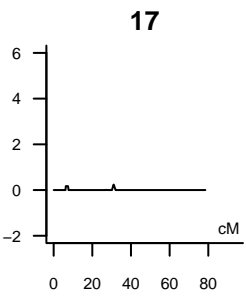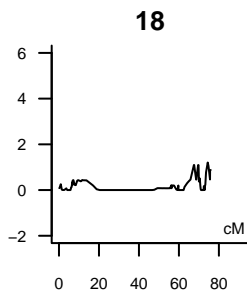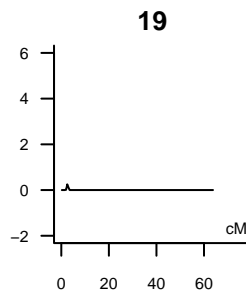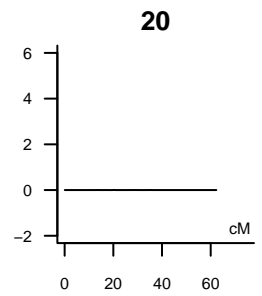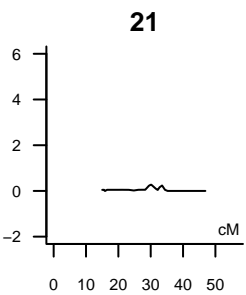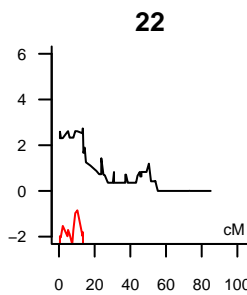

# Recessive, 0.1, 0.5

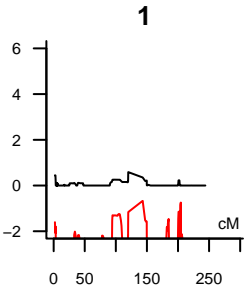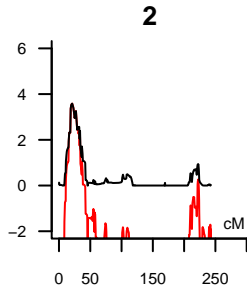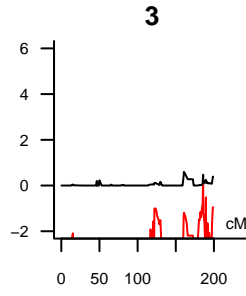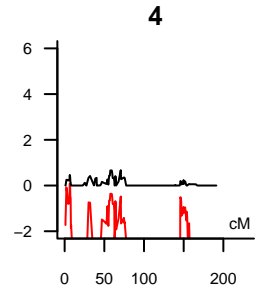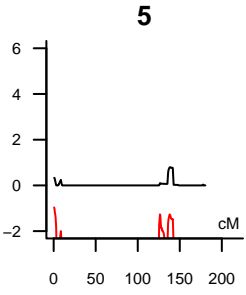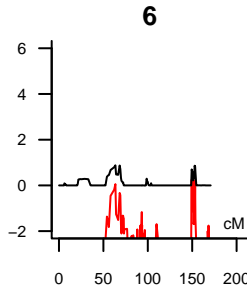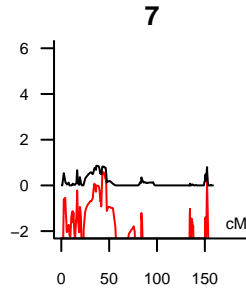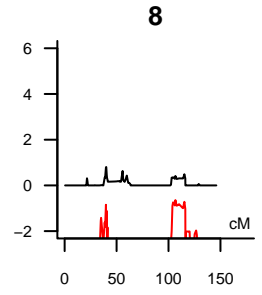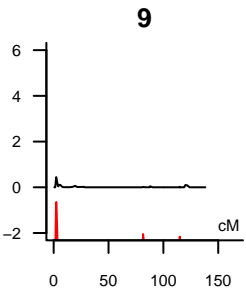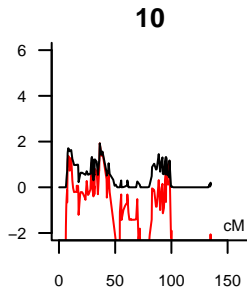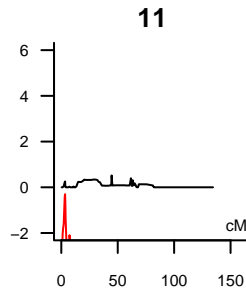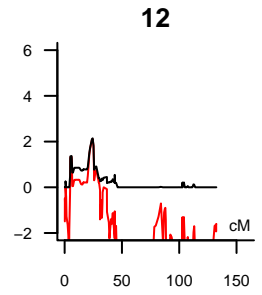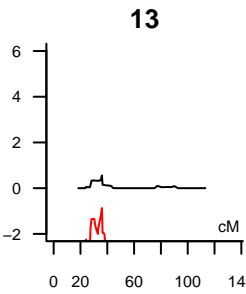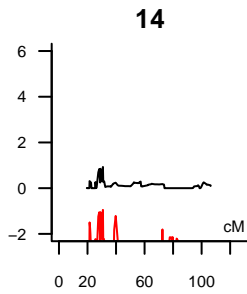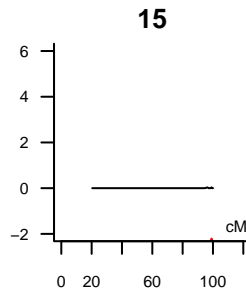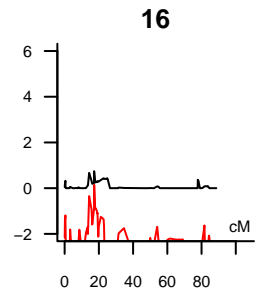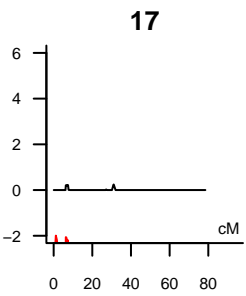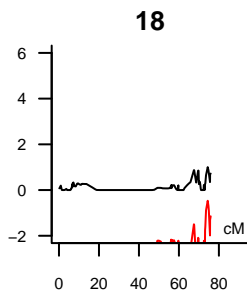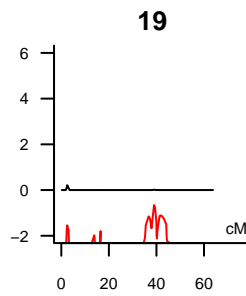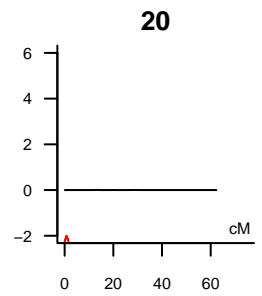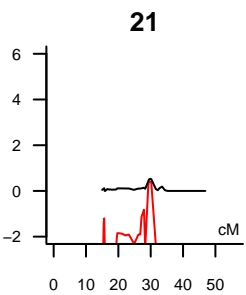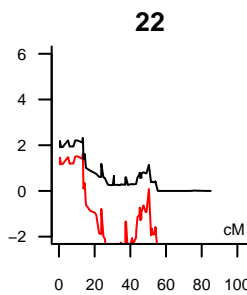

Supplement: hhe0071-0135-s01.pdf [file hhe0071-0135-s01.pdf]
